# Supplementary material for: Solvent-dependent segmental dynamics in intrinsically disordered proteins
Source: PubMed Central journal article supplement — Sci Adv. 2019 Jun 28;5(6):eaax2348. doi: 10.1126/sciadv.aax2348 (PMC6598773; doi:10.1126/sciadv.aax2348), 2019-06-28
Supplement: aax2348_SM.pdf [file aax2348_SM.pdf]

## Supplementary Materials for

### Solvent-dependent segmental dynamics in intrinsically disordered proteins

Nicola Salvi\*, Anton Abyzov, Martin Blackledge\*

\*Corresponding author. Email: nicola.salvi@ibs.fr (N.S.); martin.blackledge@ibs.fr (M.B.)

Published 28 June 2019, *Sci. Adv.* **5**, eaax2348 (2019)

DOI: 10.1126/sciadv.aax2348

#### This PDF file includes:

Table S1. Summary of the MD simulations carried out on the C-terminal domain of Sendai virus and discussed in the present work.

Table S2. Summary of the results of the ABSURD procedure.

Fig. S1. Experimental secondary chemical shifts (bars) compared with values calculated using frames extracted from the trajectories every 500 ps as input to SPARTA+.

Fig. S2. Distribution of radii of gyration in the ensemble used to seed the MD simulations (bars) compared with those calculated using frames extracted from the trajectories every 200 ps.

Fig. S3. Experimental  $^{15}\text{N}$  chemical shift anisotropy/dipole-dipole cross-correlated cross-relaxation rates ( $\eta_{xy}$ ) measured on  $\text{N}_{\text{tail}}$  compared with the results of simulations.

Fig. S4. Root-mean-square deviations between experimental and simulated spin relaxation rates at 298K.

Fig. S5. Root-mean-square deviations between experimental and simulated spin relaxation rates at 288K.

Fig. S6. Root-mean-square deviations between experimental and simulated spin relaxation rates at 278K.

Fig. S7. Time scales in the correlation function describing the contribution of backbone dihedral angles dynamics to relaxation of  $^{15}\text{N}$  backbone amide nuclei.

Fig. S8. Time scales in the correlation function describing the contribution of segmental motions to relaxation of  $^{15}\text{N}$  backbone amide nuclei.

Fig. S9. Fluctuations of the relative orientation of peptide planes measured by the order parameter  $S_{\text{seg}}^2$ .

Fig. S10. Time scales extracted from fits of correlation functions describing the rotational dynamics of segments to mono-exponential decays.

Fig. S11. Time scales associated with intra-segment dynamics at 288K (orange circles) are compared with the longest time scale resulted from fitting segmental dynamics correlation functions (gray squares).

Fig. S12. Time scales associated with intra-segment dynamics at 278K (yellow circles) are compared with the longest time scale resulted from fitting segmental dynamics correlation functions (gray squares).

Reference (61)

**Table S1. Summary of the MD simulations carried out on the C-terminal domain of Sendai virus and discussed in the present work.**  
 Simulations **A4P\_25** and **C3P\_25** were presented in references (28) and (30).

|                                              | trajectories | ns/trajectory | total sim. time ( $\mu$ s) | ns/segment | segments/traj | segments   |
|----------------------------------------------|--------------|---------------|----------------------------|------------|---------------|------------|
| <b>C36m/TIP3P, 25°C (C3P@25C)</b>            | 24           | 200           | 4.8                        | 100        | 3             | 72         |
| <b>C36m/TIP3P, 15°C (C3P@15C)</b>            | 22           | 300           | 6.6                        | 200        | 2             | 44         |
| <b>C36m/TIP3P, 5°C (C3P@5C)</b>              | 22           | 400           | 8.8                        | 300        | 2             | 44         |
| <b>C36m/TIP4P/2005, 25°C (C4P@25C)</b>       | 21           | 200           | 4.2                        | 100        | 3             | 63         |
| <b>C36m/TIP4P/2005, 15°C (C4P@15C)</b>       | 20           | 300           | 6.0                        | 200        | 2             | 40         |
| <b>C36m/TIP4P/2005, 5°C (C4P@5C)</b>         | 28           | 400           | 11.2                       | 300        | 2             | 56         |
| <b>A99SB-ILDN/TIP4P/2005, 25°C (A4P@25C)</b> | 10           | 250           | 2.5                        | 100        | 4             | 40         |
| <b>A99SB-ILDN/TIP4P/2005, 15°C (A4P@15C)</b> | 25           | 300           | 7.5                        | 200        | 2             | 50         |
| <b>A99SB-ILDN/TIP4P/2005, 5°C (A4P@5C)</b>   | 21           | 400           | 8.4                        | 300        | 2             | 42         |
| <b>total</b>                                 | <b>193</b>   |               | <b>60.0</b>                |            |               | <b>451</b> |

**Table S2. Summary of the results of the ABSURD procedure.**

|                                              | Relaxation rate used for the selection         | $\chi_{ABSURD}^2/\chi_{average}^2$ | Number of selected segments |
|----------------------------------------------|------------------------------------------------|------------------------------------|-----------------------------|
| <b>C36m/TIP3P, 25°C (C3P@25C)</b>            | $^{15}\text{N}\{\text{H}\}$ NOE at 600 MHz (5) | 0.246                              | 17                          |
| <b>C36m/TIP3P, 15°C (C3P@15C)</b>            | $\eta_{xy}$ at 850 MHz                         | 0.402                              | 10                          |
| <b>C36m/TIP3P, 5°C (C3P@5C)</b>              | $\eta_{xy}$ at 600 MHz                         | 0.397                              | 6                           |
| <b>C36m/TIP4P/2005, 25°C (C4P@25C)</b>       | $^{15}\text{N}$ $R_2$ at 950 MHz               | 0.123                              | 10                          |
| <b>C36m/TIP4P/2005, 15°C (C4P@15C)</b>       | $\eta_{xy}$ at 850 MHz                         | 0.133                              | 7                           |
| <b>C36m/TIP4P/2005, 5°C (C4P@5C)</b>         | $^{15}\text{N}$ $R_2$ at 850 MHz               | 0.048                              | 6                           |
| <b>A99SB-ILDN/TIP4P/2005, 25°C (A4P@25C)</b> | $^{15}\text{N}$ $R_2$ at 950 MHz (6)           | 0.160                              | 6                           |
| <b>A99SB-ILDN/TIP4P/2005, 15°C (A4P@15C)</b> | $^{15}\text{N}$ $R_2$ at 700 MHz               | 0.133                              | 5                           |
| <b>A99SB-ILDN/TIP4P/2005, 5°C (A4P@5C)</b>   | $\eta_{xy}$ at 600 MHz                         | 0.072                              | 5                           |

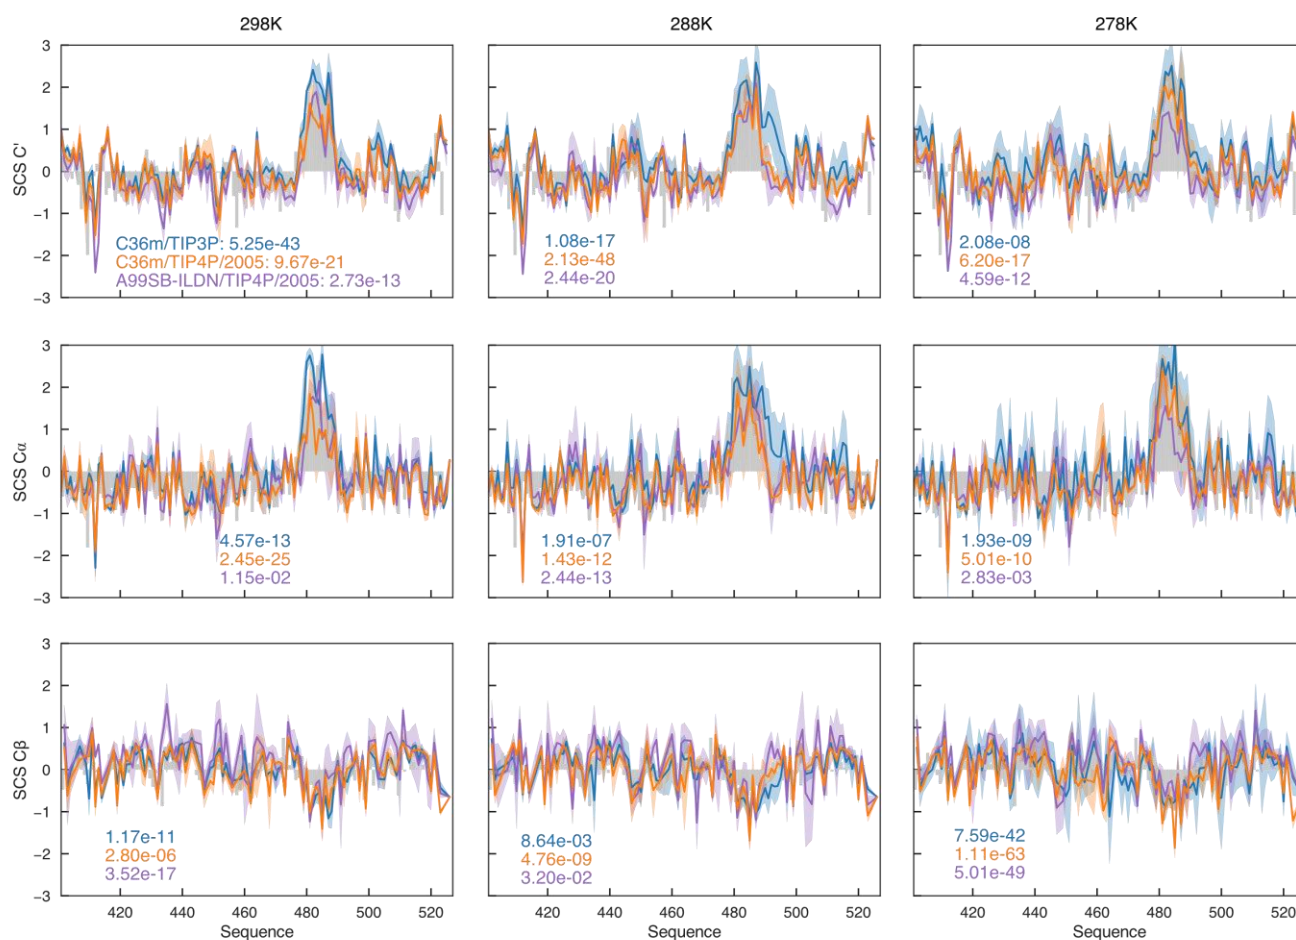

**Fig. S1. Experimental secondary chemical shifts (bars) compared with values calculated using frames extracted from the trajectories every 500 ps as input to SPARTA+ (61).**

Blue, orange and purple lines correspond to simulations **C3P**, **C4P** and **A4P**, respectively. p-values corresponding to the three simulation are shown in the panels. Notice that simulated values at 25 (left), 15 (middle) and 5 °C (right) are all compared to experimental values measured at 25 °C.  $^{13}\text{C}$  chemical shifts in  $N_{\text{tail}}$  change modestly with temperature (29).

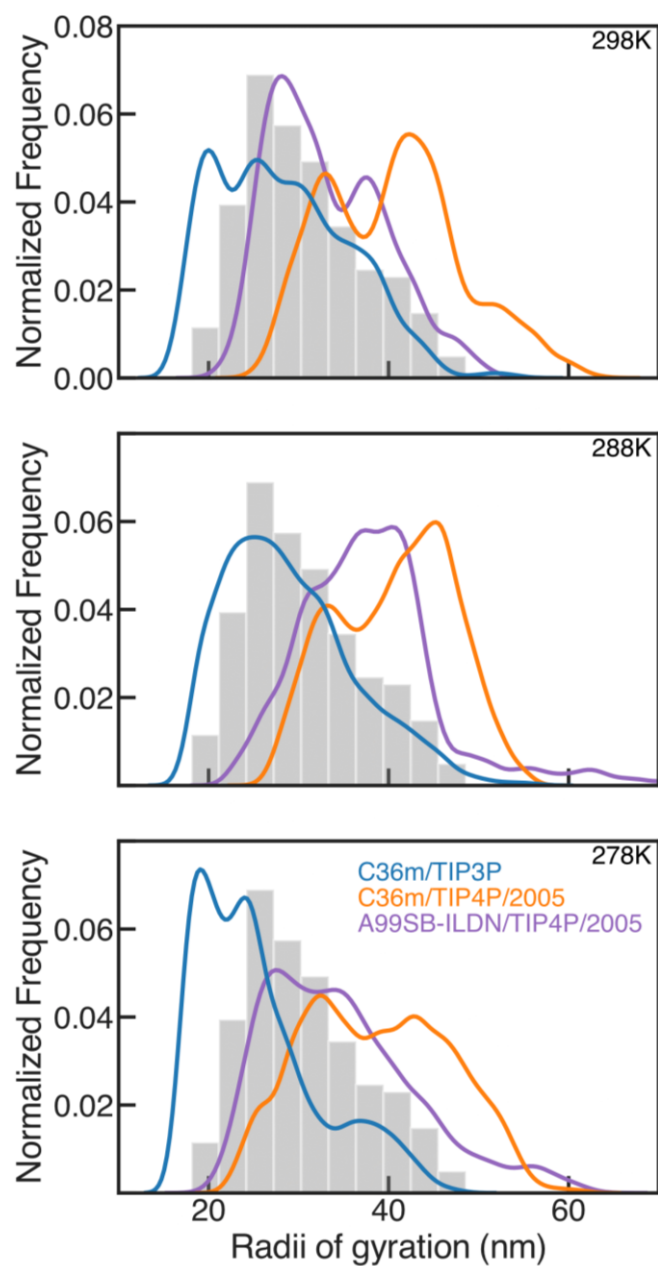

**Fig. S2. Distribution of radii of gyration in the ensemble used to seed the MD simulations (bars) compared with those calculated using frames extracted from the trajectories every 200 ps. Blue, orange and purple lines correspond to simulations C3P, C4P and A4P, respectively.**

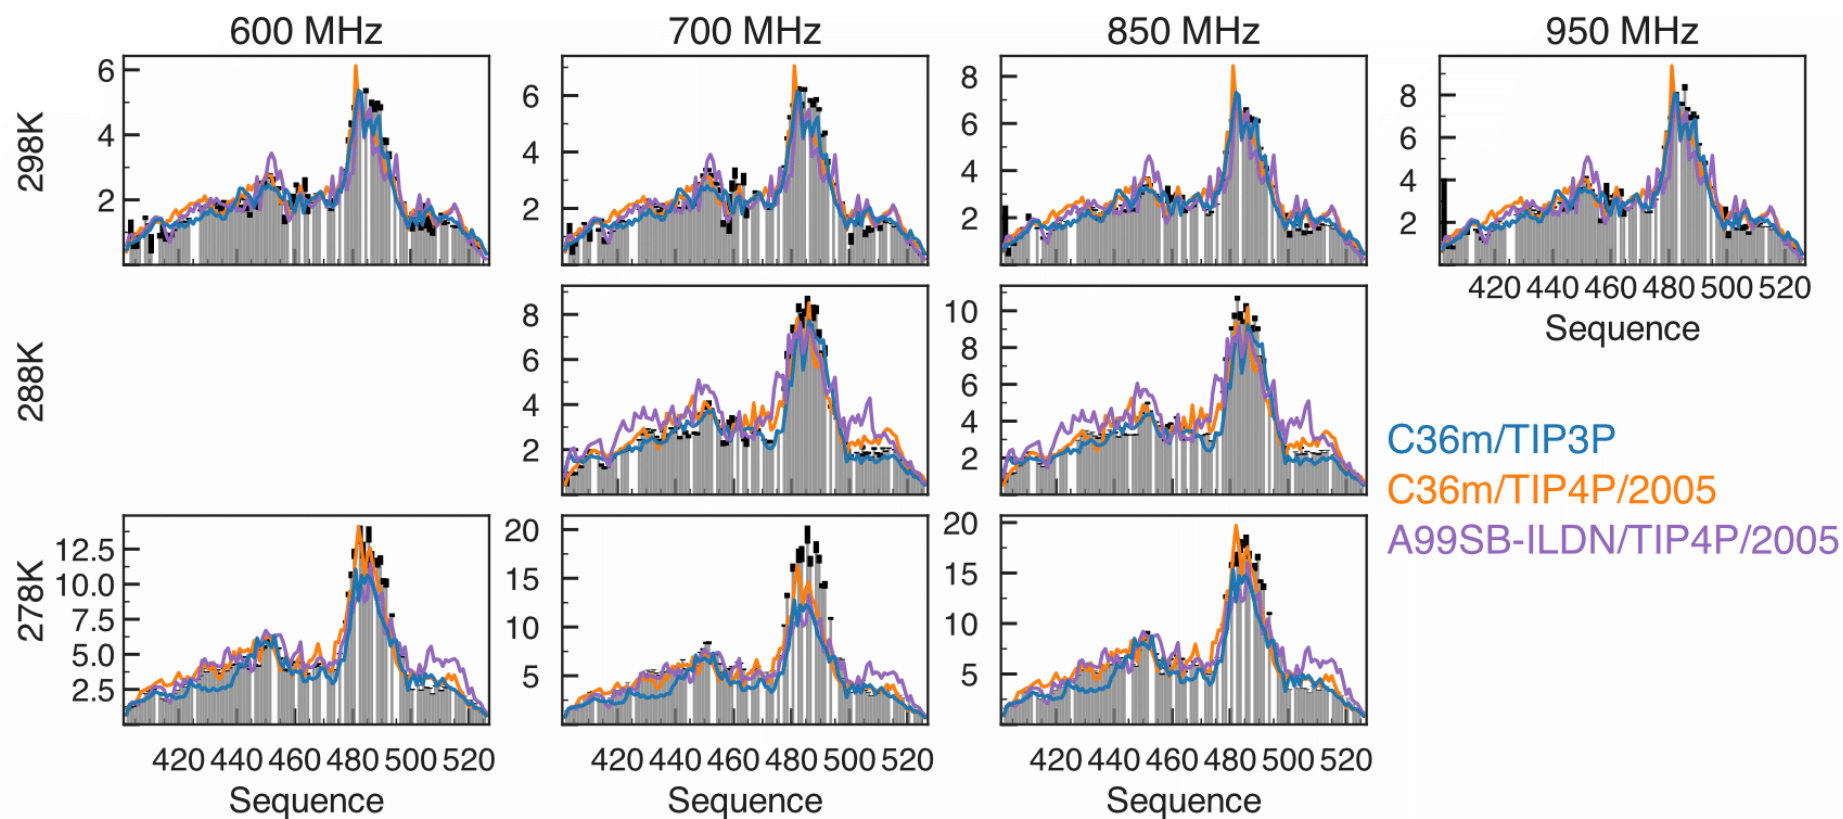

**Fig. S3. Experimental  $^{15}\text{N}$  chemical shift anisotropy/dipole-dipole cross-correlated cross-relaxation rates ( $\eta_{xy}$ ) measured on  $N_{\text{tail}}$  compared with the results of simulations.** All simulations - C3P (blue line), C4P (orange), and A4P (purple) - reproduce, at least qualitatively, the sequence dependence of  $R_2$  rates. However, we notice that simulations are more accurate at room temperature than at lower T. All rates are reported in  $\text{s}^{-1}$

|             |                      |                      |                      |                      |
|-------------|----------------------|----------------------|----------------------|----------------------|
| $R_1$       | 0.13<br>0.12<br>0.12 | 0.17<br>0.12<br>0.12 | 0.27<br>0.12<br>0.13 | 0.20<br>0.13<br>0.13 |
| $R_2$       | 0.37<br>0.55<br>0.65 | 0.46<br>0.66<br>0.78 | 0.58<br>0.75<br>0.90 | 0.65<br>0.84<br>1.02 |
| nOe         | 0.21<br>0.21<br>0.21 | 0.12<br>0.12<br>0.15 | 0.14<br>0.09<br>0.13 | 0.10<br>0.08<br>0.13 |
| $\eta_{xy}$ | 0.36<br>0.44<br>0.53 | 0.47<br>0.55<br>0.66 | 0.40<br>0.56<br>0.65 | 0.50<br>0.66<br>0.77 |
|             | 600                  | 700                  | 850                  | 950 MHz              |

**Fig. S4. Root-mean-square deviations between experimental and simulated spin relaxation rates at 298K.** Values calculated using simulations C3P, C4P, and A4P are shown in blue, orange and purple, selectively

|             |                      |                      |                      |         |
|-------------|----------------------|----------------------|----------------------|---------|
| $R_1$       | 0.14<br>0.14<br>0.12 | 0.16<br>0.14<br>0.11 | 0.20<br>0.15<br>0.13 | —       |
| $R_2$       | 0.49<br>0.78<br>1.14 | 0.55<br>0.87<br>1.29 | 0.84<br>1.05<br>1.43 | —       |
| nOe         | 0.18<br>0.14<br>0.17 | 0.15<br>0.11<br>0.13 | 0.14<br>0.08<br>0.09 | —       |
| $\eta_{xy}$ | —                    | 0.54<br>0.72<br>0.84 | 0.71<br>0.83<br>0.93 | —       |
|             | 600                  | 700                  | 850                  | 950 MHz |

**Fig. S5. Root-mean-square deviations between experimental and simulated spin relaxation rates at 288K.** Values calculated using simulations C3P, C4P, and A4P are shown in blue, orange and purple, selectively.



|             |                      |                      |                      |                      |
|-------------|----------------------|----------------------|----------------------|----------------------|
| $R_1$       | 0.21<br>0.65<br>0.53 | 0.20<br>0.74<br>0.59 | 0.37<br>0.77<br>0.62 | 0.55<br>0.81<br>0.66 |
| $R_2$       | 0.93<br>0.95<br>0.91 | 0.93<br>0.96<br>0.91 | 0.93<br>0.95<br>0.91 | 0.93<br>0.95<br>0.91 |
| nOe         | 0.88<br>0.94<br>0.88 | 0.88<br>0.93<br>0.87 | 0.89<br>0.92<br>0.86 | 0.88<br>0.90<br>0.85 |
| $\eta_{xy}$ | 0.95<br>0.96<br>0.92 | 0.94<br>0.95<br>0.91 | 0.94<br>0.95<br>0.92 | —                    |
|             | 600                  | 700                  | 850                  | 950 MHz              |

**Fig. S6. Root-mean-square deviations between experimental and simulated spin relaxation rates at 278K.** Values calculated using simulations C3P, C4P, and A4P are shown in blue, orange and purple, selectively.

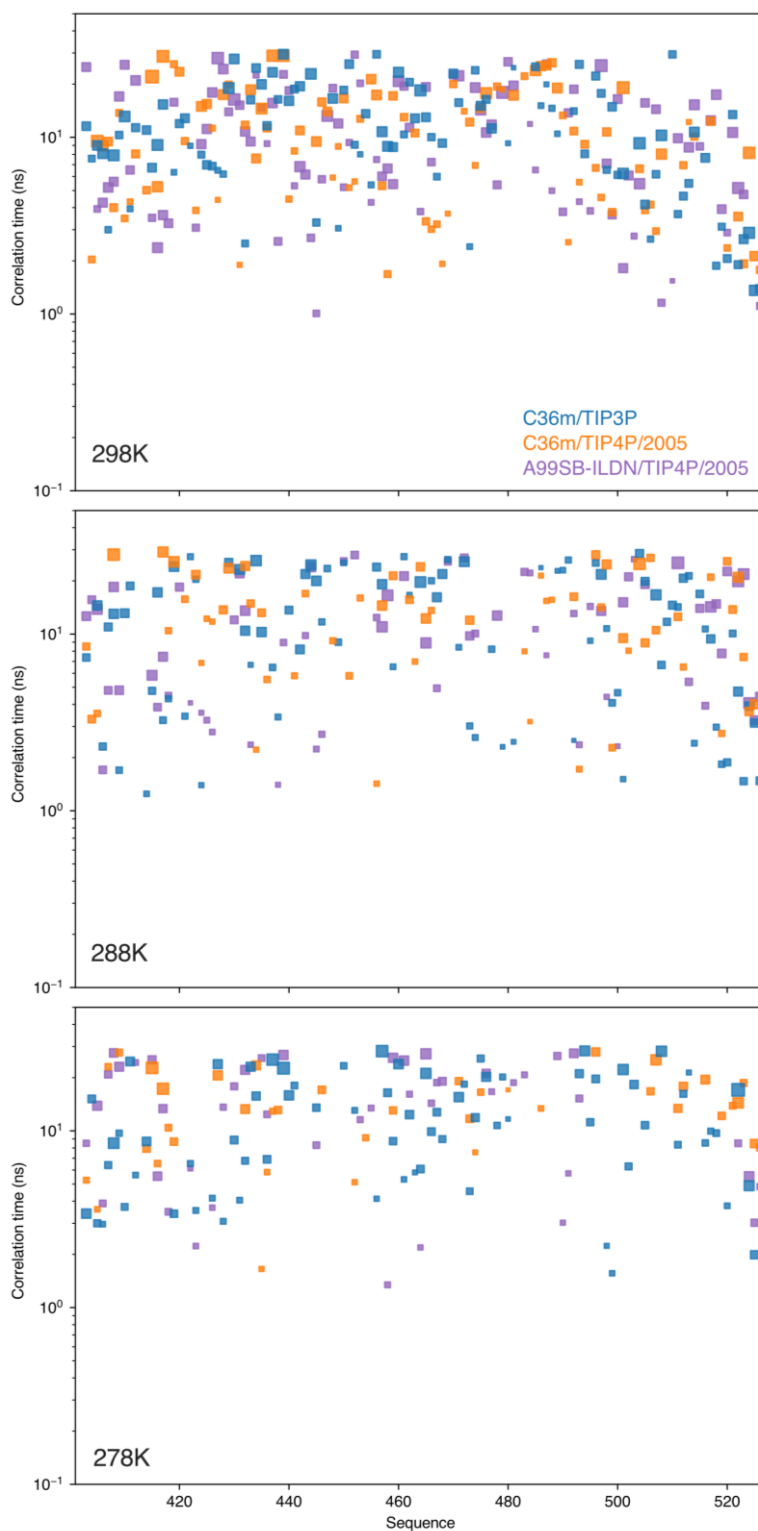

**Fig. S7. Time scales in the correlation function describing the contribution of backbone dihedral angles dynamics to relaxation of  $^{15}\text{N}$  backbone amide nuclei.** Symbol areas are proportional to the amplitude of the associated motional time scale at 298 (top), 288 (middle) and 278K (bottom).

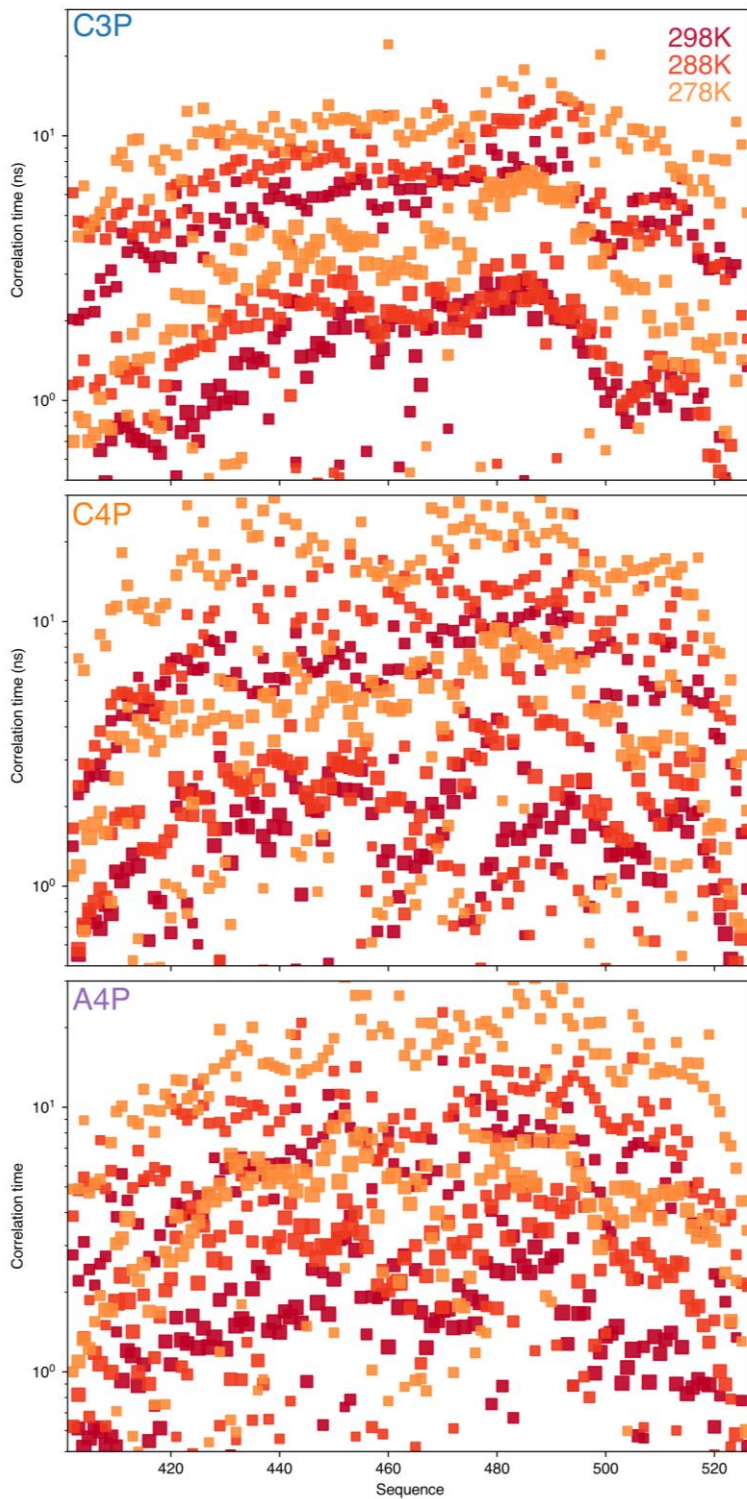

**Fig. S8. Time scales in the correlation function describing the contribution of segmental motions to relaxation of  $^{15}\text{N}$  backbone amide nuclei.** The size of the square is proportional to the amplitude of motions at the associated time scale in **C3P** (top), **C4P** (middle), and **A4P** (bottom).

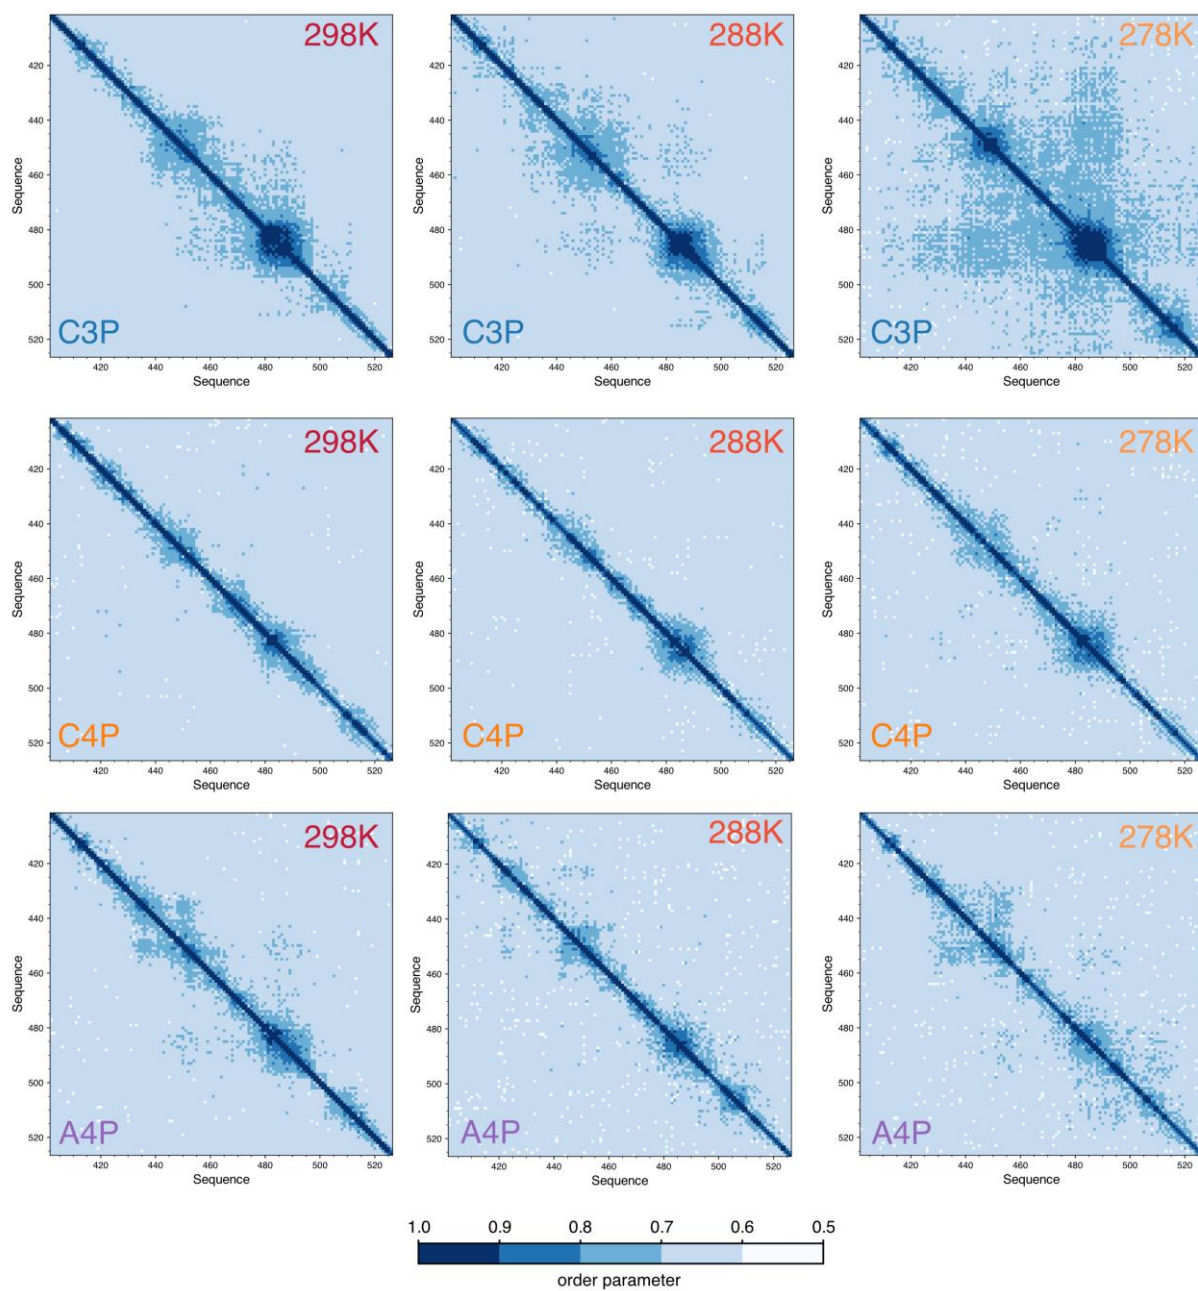

**Fig. S9. Fluctuations of the relative orientation of peptide planes measured by the order parameter  $S^2_{seg}$ .** The definition of order parameter is given in SI text. Order parameters are evaluated at different simulation temperatures and force field combinations. (top row: **C3P**; center: **C4P**; bottom row: **A4P**; left column: 298K; middle: 288K; right column: 278K).

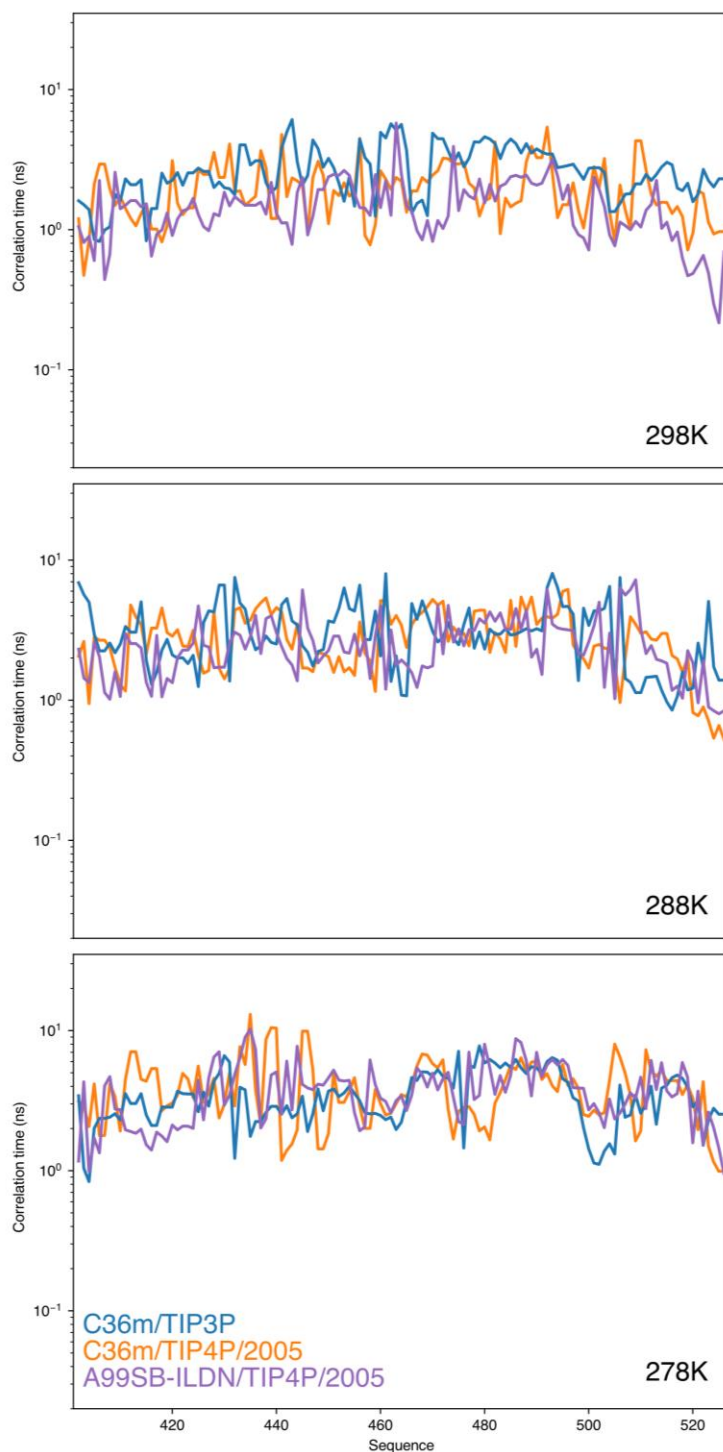

**Fig. S10. Time scales extracted from fits of correlation functions describing the rotational dynamics of segments to mono-exponential decays.** At all temperatures (top: 298K; middle: 288K; bottom: 278K) the three combination of protein/water force fields used in this paper produce equivalent descriptions of inter-segment dynamics.

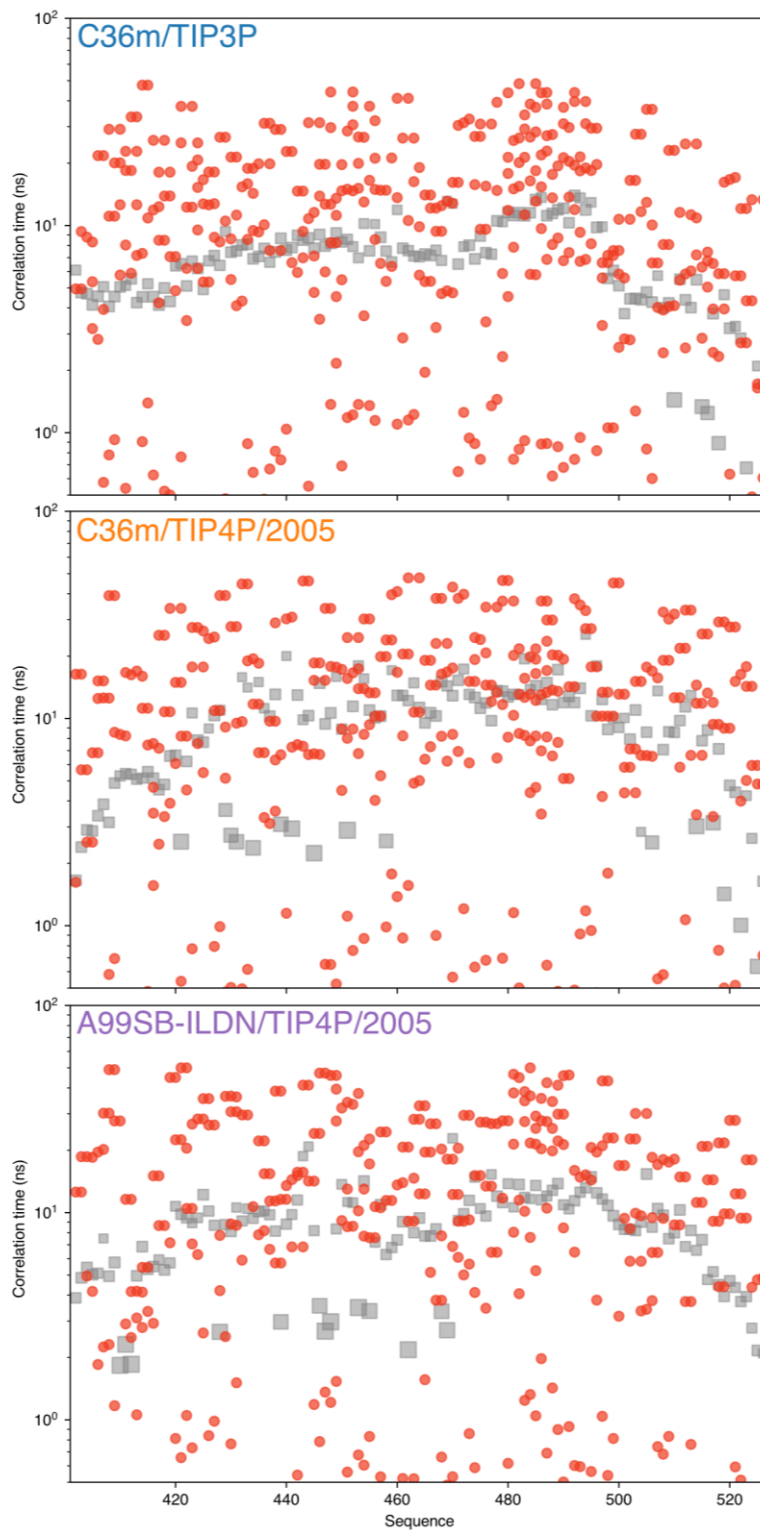

**Fig. S11. Time scales associated with intra-segment dynamics at 288K (orange circles) are compared with the longest timescale resulted from fitting segmental dynamics correlation functions (gray squares). (top row: C3P; center: C4P; bottom row: A4P). See also fig. S8.**

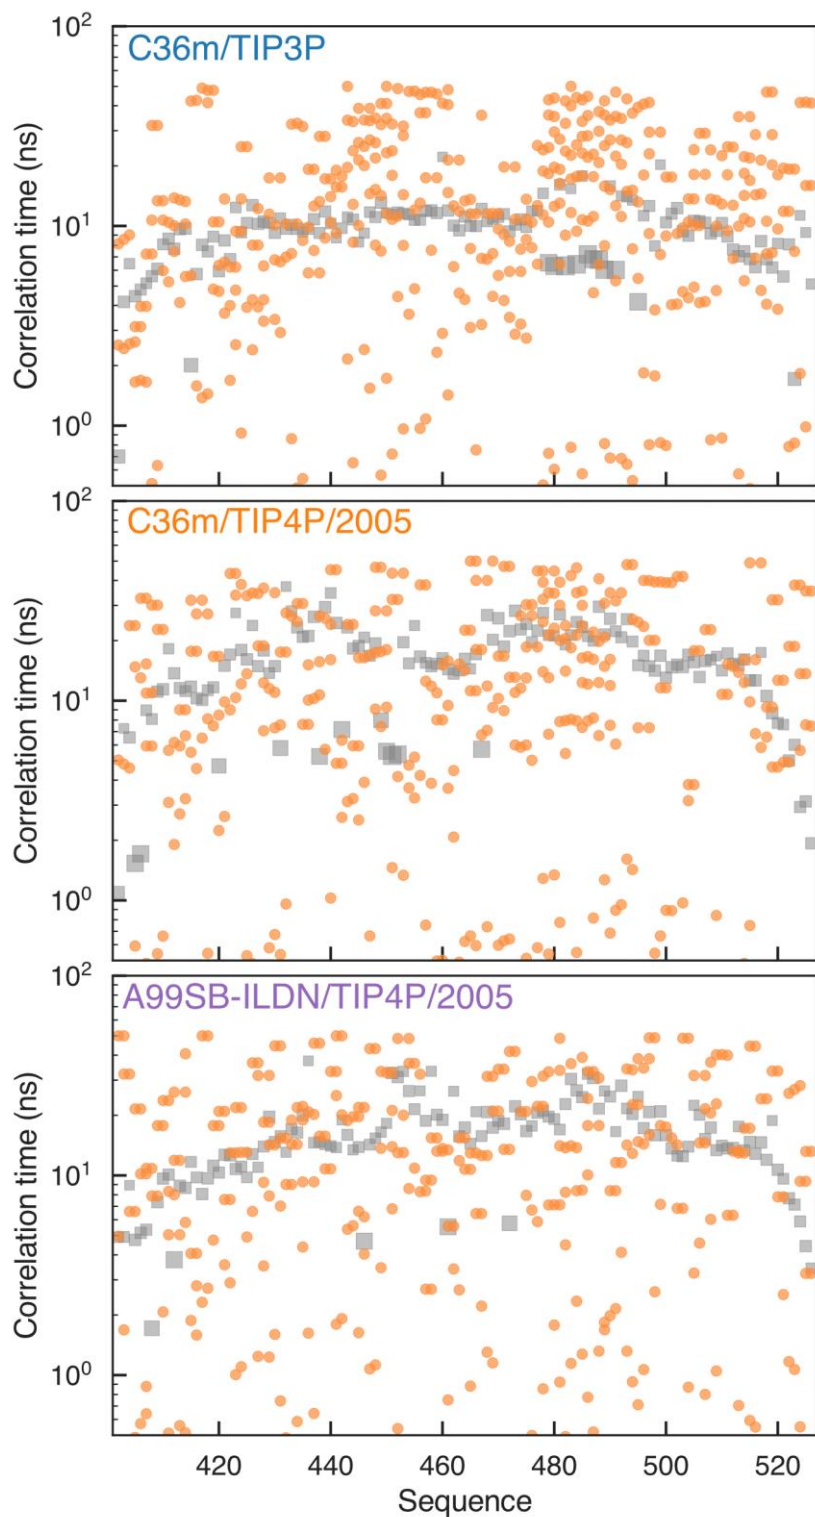

**Fig. S12. Time scales associated with intra-segment dynamics at 278K (yellow circles) are compared with the longest time scale resulted from fitting segmental dynamics correlation functions (gray squares). (top row: C3P; center: C4P; bottom row: A4P). See also fig. S8.**
